# Supplementary material for: Magnetic solid-phase extraction coupled with HPLC-Q-TOF-MS for rapid analysis of tyrosinase binders from San-Bai decoction by Box–Behnken statistical design
Source: Royal Society of Chemistry journal article supplement (doi:10.1039/c6ra22045b), 2016-01-01
Supplement: c6ra22045b1.pdf [file c6ra22045b1.pdf]

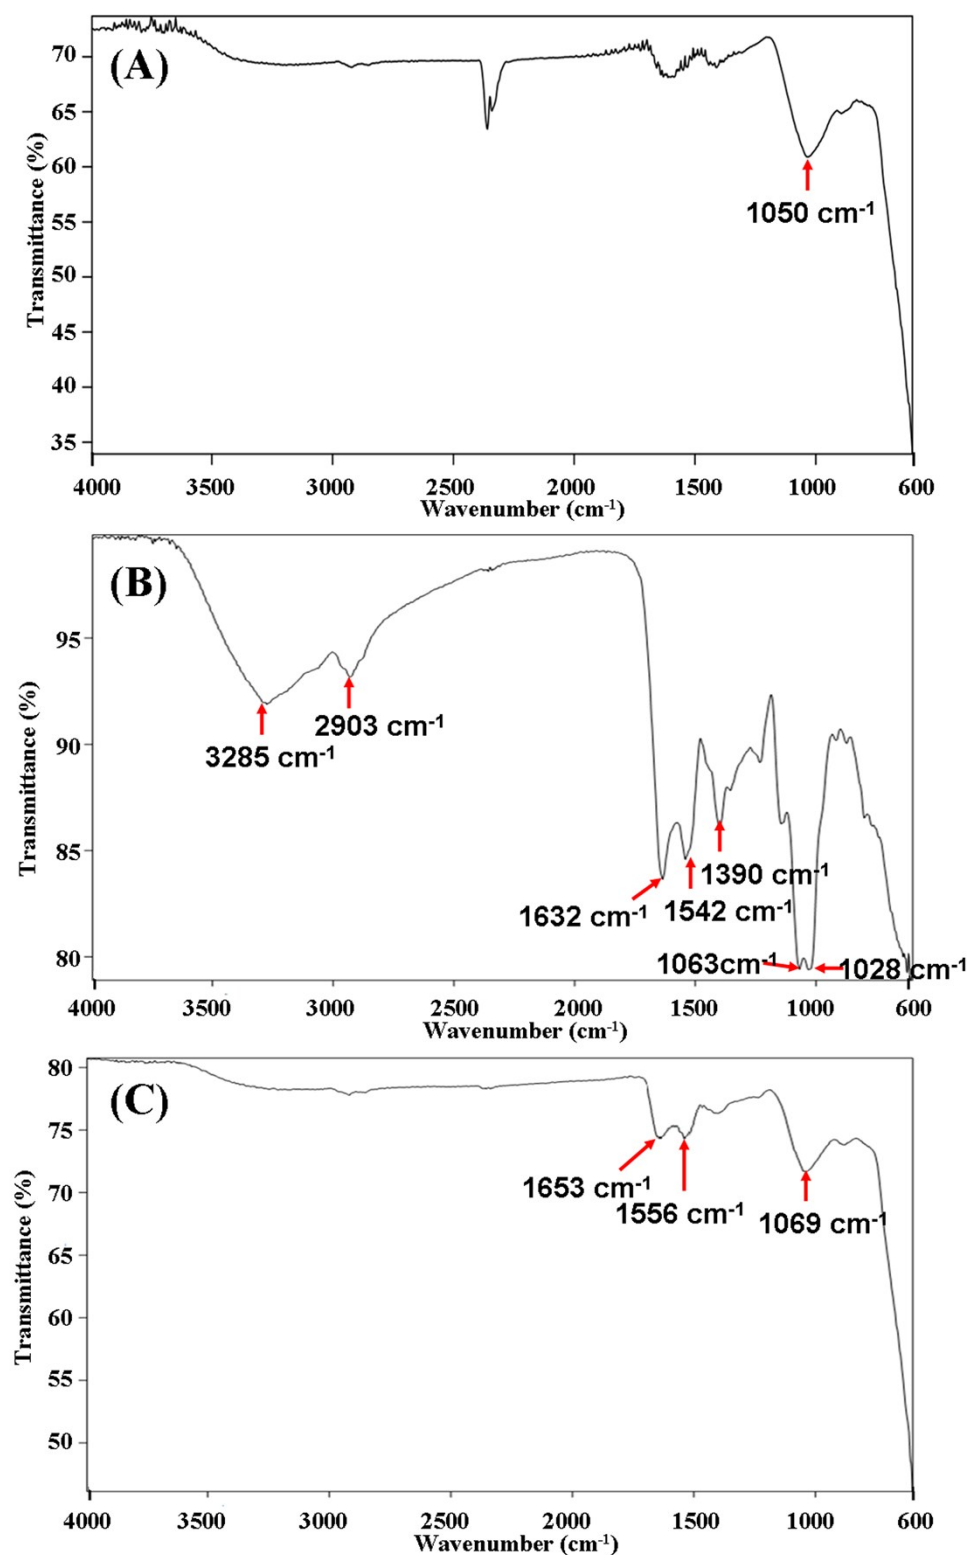

Figure S1. IR spectra of (A) magnetic beads, (B) tyrosinase and (C) tyrosinase conjugated magnetic beads

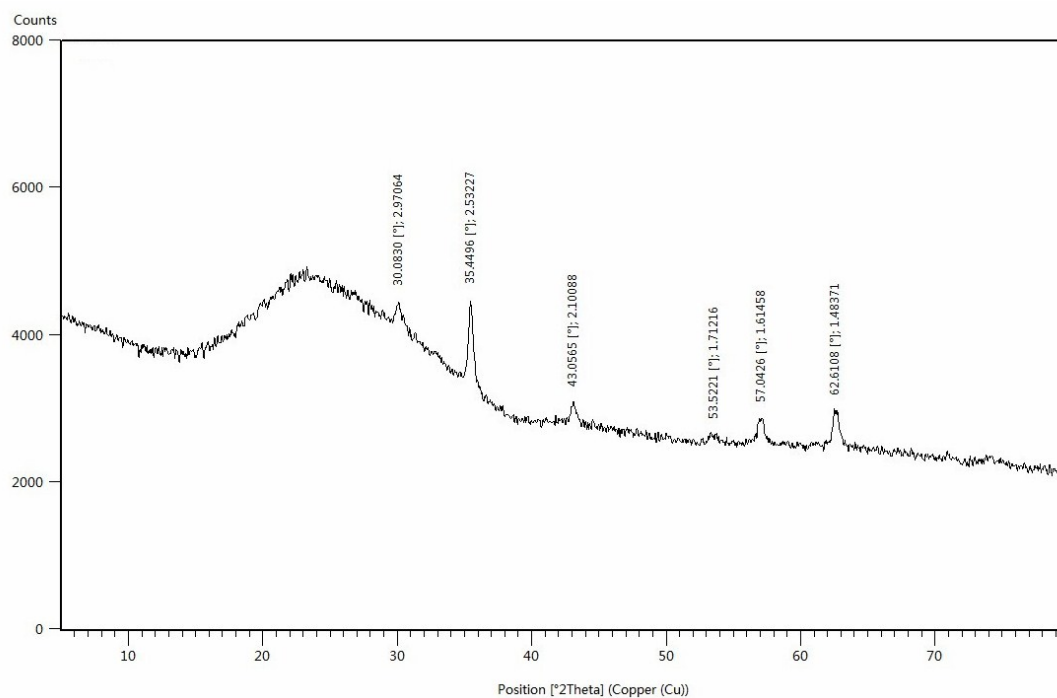

**Figure S2.X-ray diffraction image of magnetic beads**

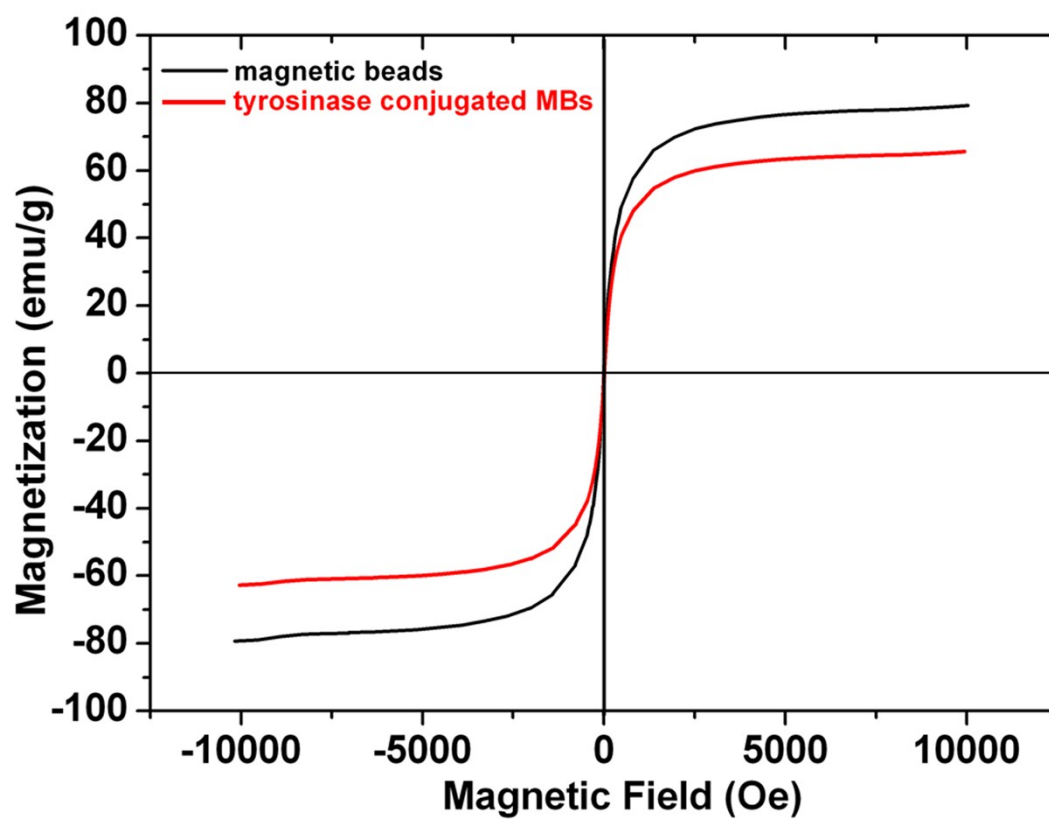

Figure S3. Magnetic Curves of magnetic beads (Black) and tyrosinase conjugated magnetic beads (Red)

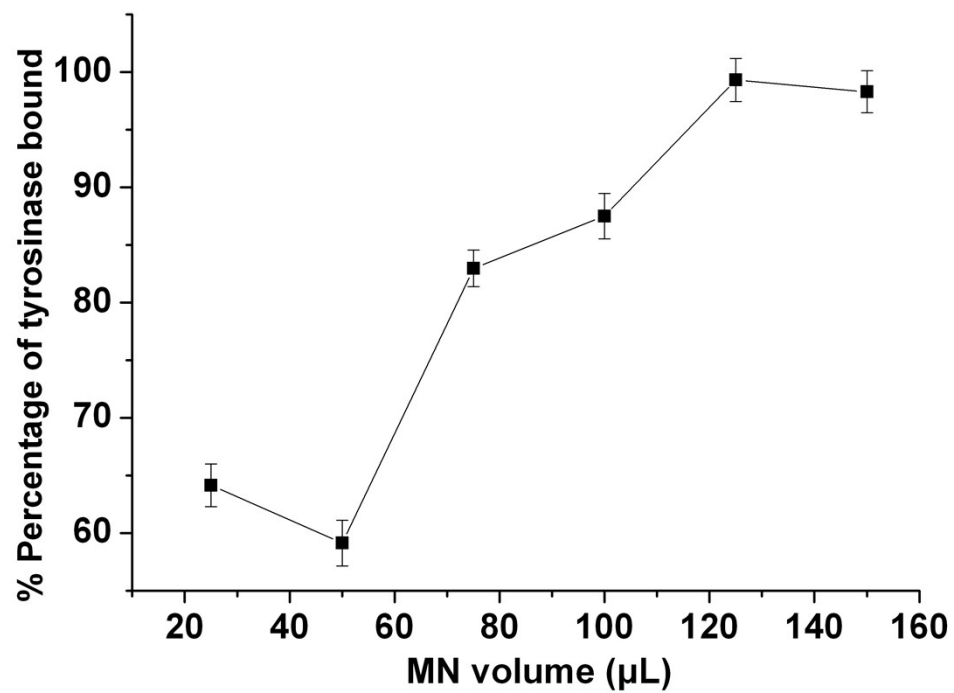

Figure S4. Effect of the amount of  $\text{Fe}_3\text{O}_4$  beads added on the percentage of tyrosinase conjugated

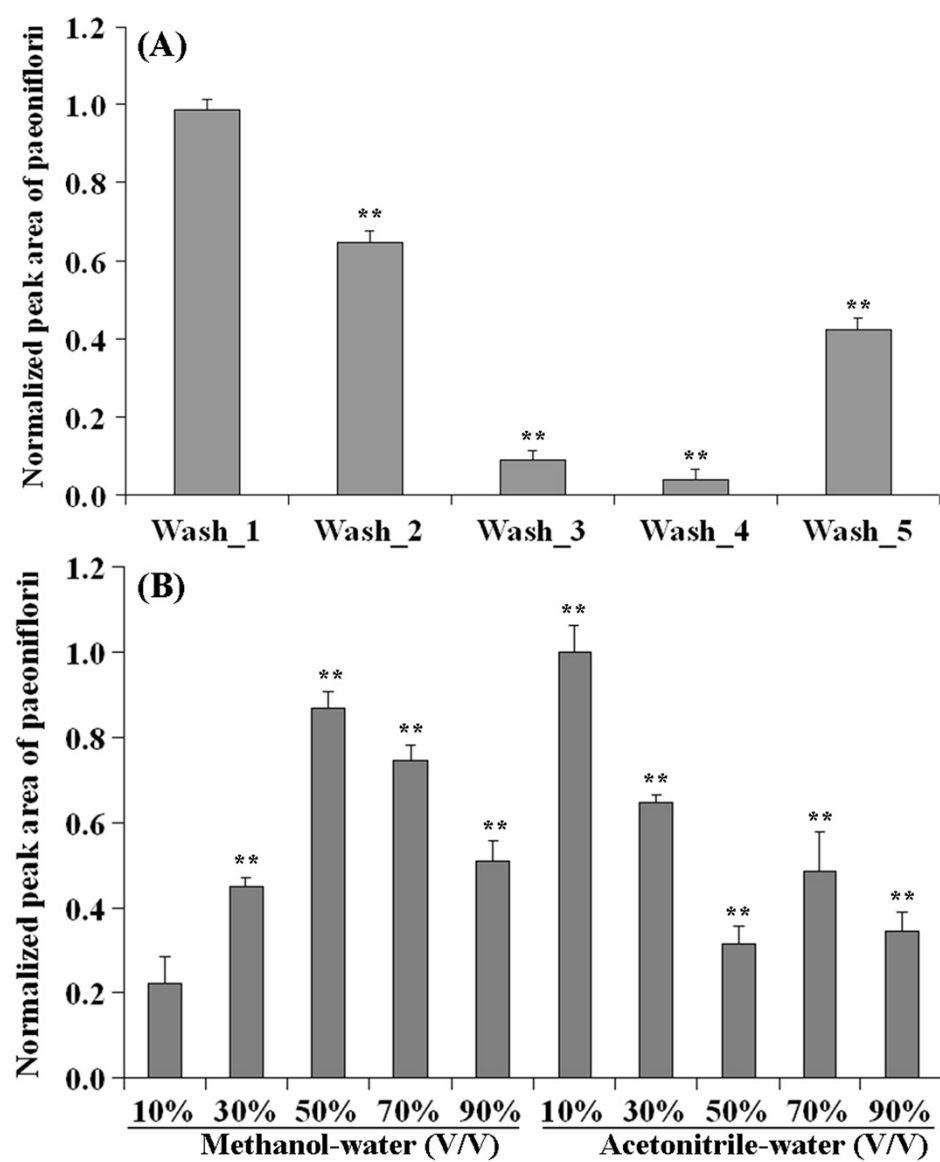

Figure S5.Effect of wash times and wash solvent on the extraction yield

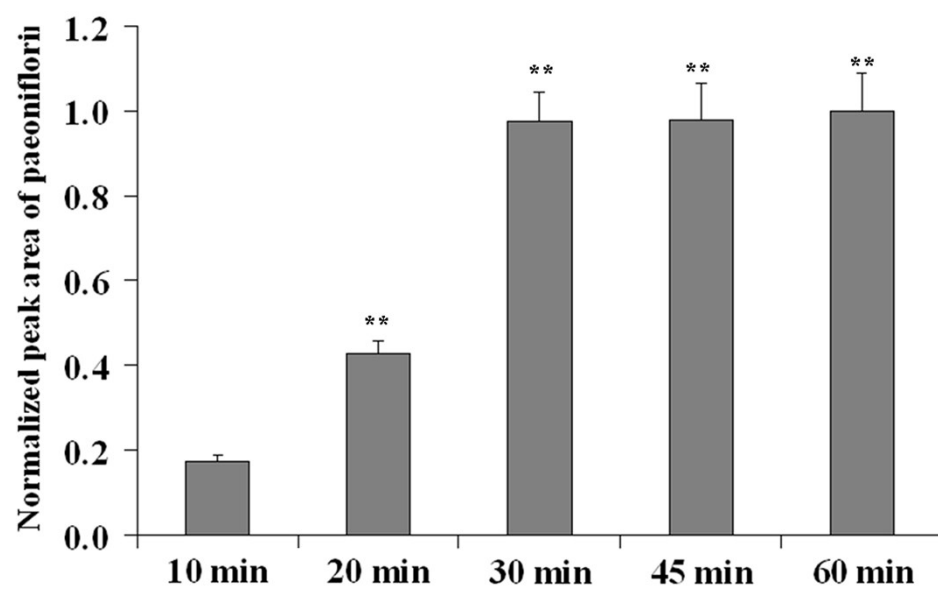

Figure S6.Effect of incubation time on the extraction yield

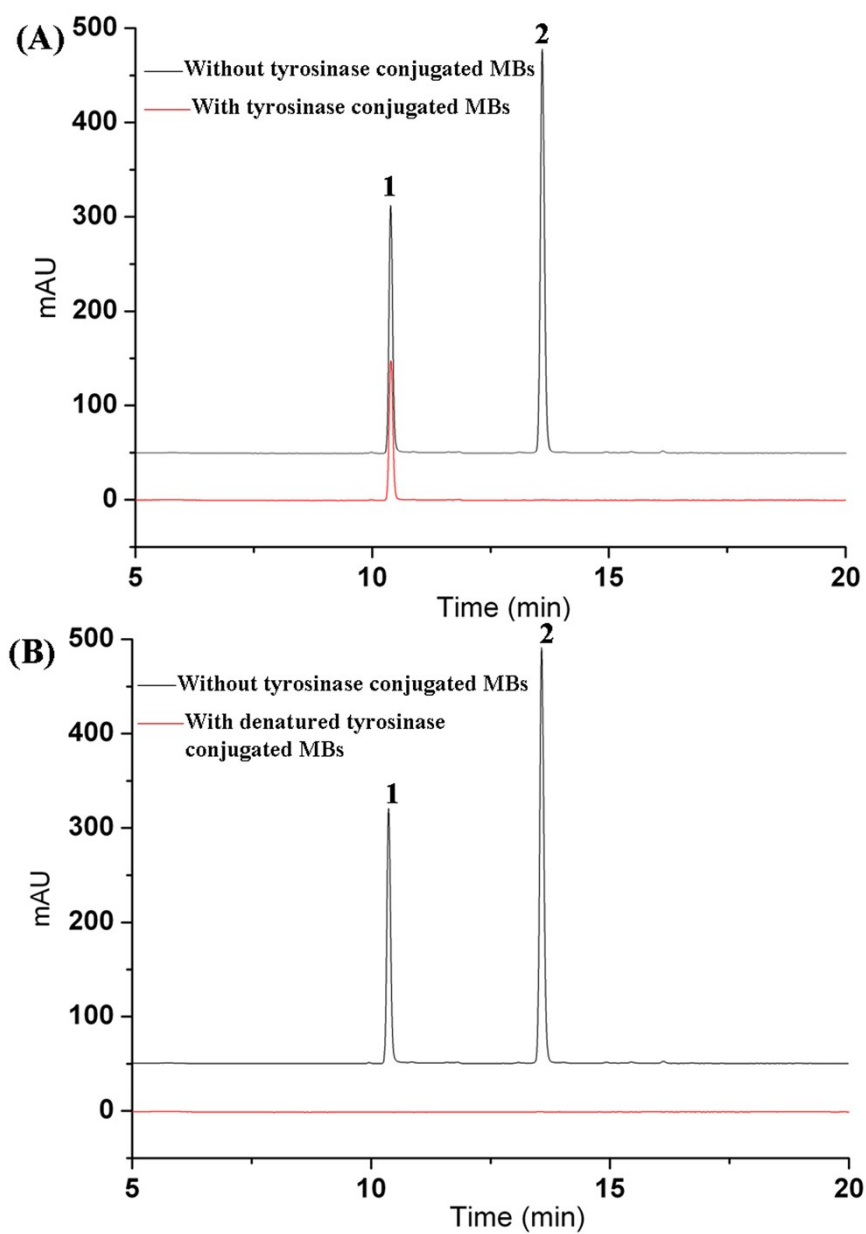

**Figure S7.** Specificity of the tyrosinase conjugated magnetic beads based approach

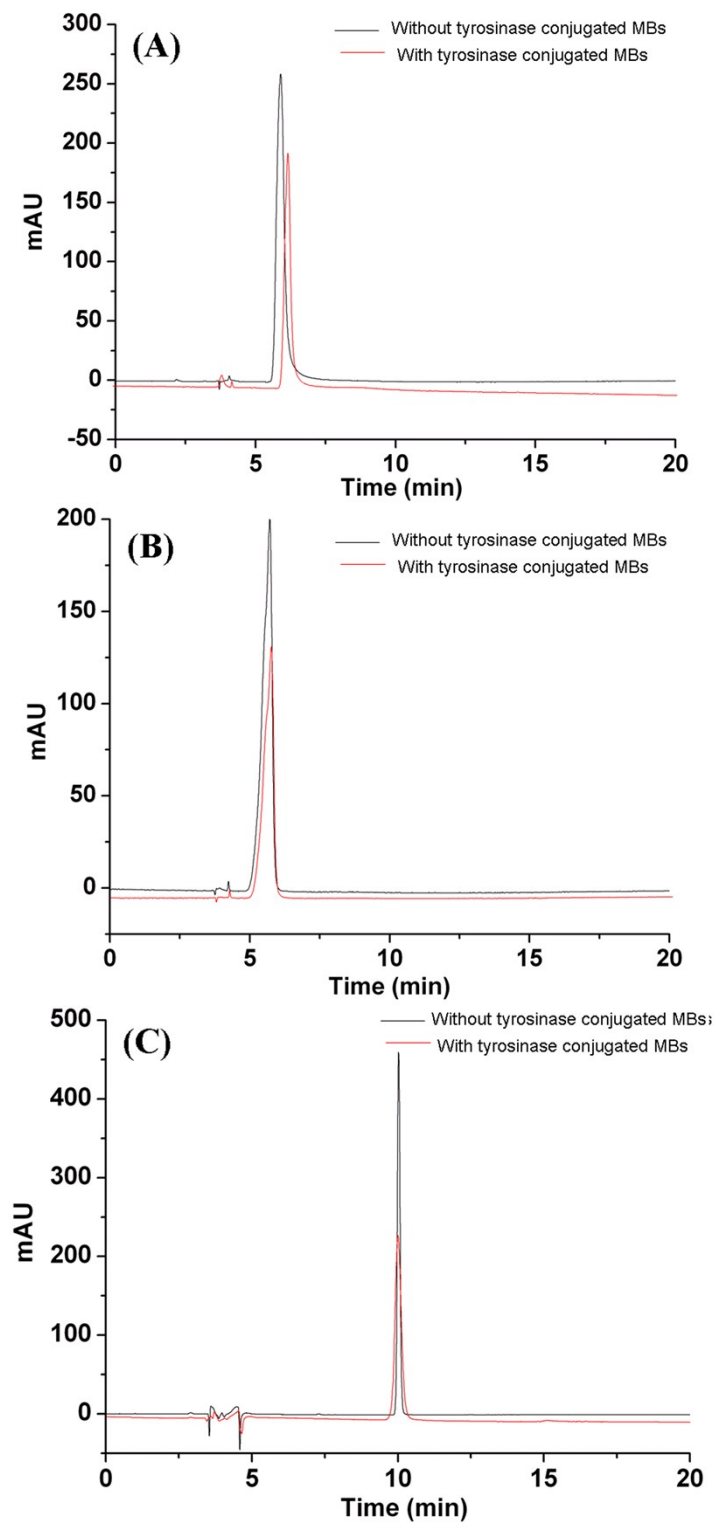

Figure S8.HPLC chromatograms of kojic acid (A), arbutin (B) and vanillic acid (C)



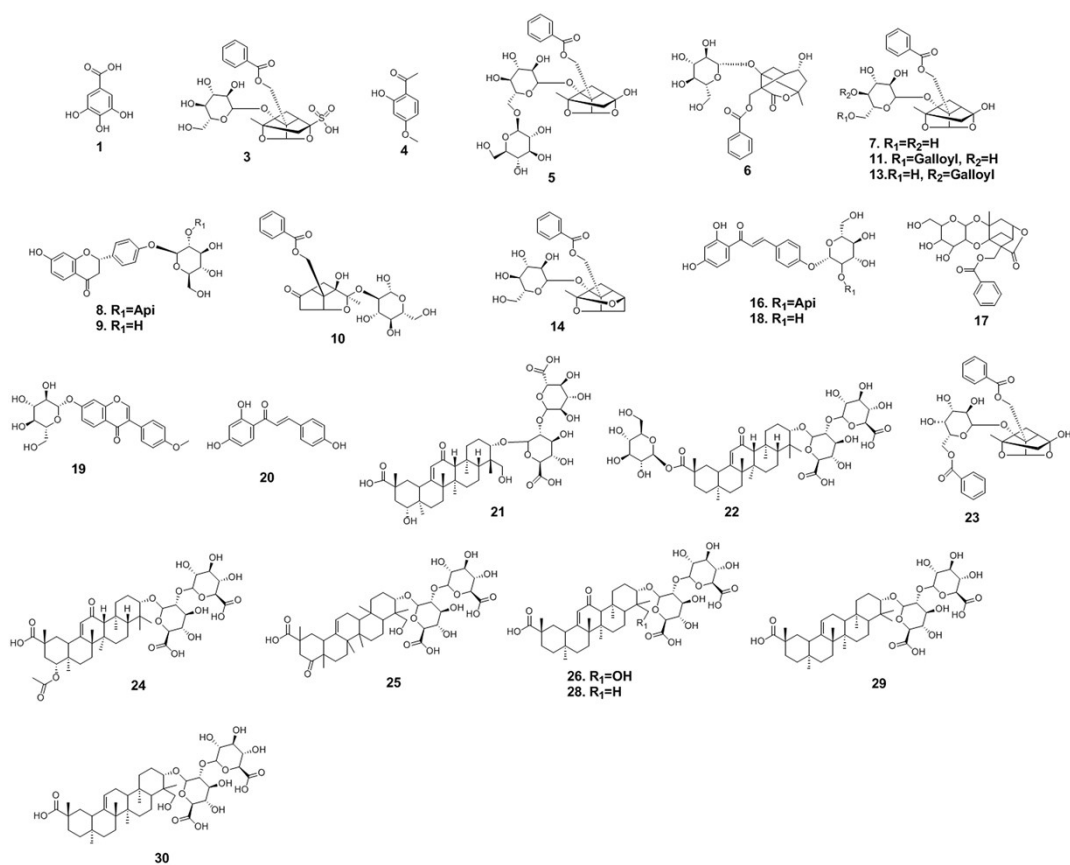

**Figure S9. Chemical structures of constituents in San-Bai decoction**

**Table S1. Contents of the major compounds in San-Bai decoction**

| <b>No.</b> | <b>Compounds</b>                   | <b>Concentration<br/>(mg/mL )</b> |
|------------|------------------------------------|-----------------------------------|
| 1          | Albiflorin                         | 0.132                             |
| 2          | Paeoniflorin                       | 0.244                             |
| 3          | Liquiritin apioside                | 0.027                             |
| 4          | Liquiritin                         | 0.002                             |
| 5          | 6'- <i>O</i> -Galloyl paeoniflorin | 0.013                             |
| 6          | Ononin                             | 0.004                             |
| 7          | Glycyrrhizic acid                  | 0.044                             |

**Table S2. A comparison between the literature method and our method**

| <b>Method</b>                            | <b>Literature</b>                                                                  | <b>This study</b>                                               |
|------------------------------------------|------------------------------------------------------------------------------------|-----------------------------------------------------------------|
| <b>Materials</b>                         | Amine-terminated<br>magnetic nanoparticles<br>(i.d.50 nm)                          | Carboxyl functionalized<br>magnetic beads (i.d. 400-<br>500 nm) |
| <b>Enzyme immobilization<br/>solvent</b> | Glutaraldehyde                                                                     | EDC/NHS                                                         |
| <b>Detection instrument</b>              | Finnigan LCQ <sup>deca</sup> plus ion<br>trap mass spectrometer<br>(Low precision) | AB ScieX 5600 Q-TOF<br>mass spectrometer<br>(High precision)    |
| <b>Protein-material amount<br/>ratio</b> | 152 µg/mg                                                                          | 800 µg/mg                                                       |
| <b>Dissociate solvent</b>                | Methanol<br>(not optimized)                                                        | 10% Acetonitrile–water<br>(optimized)                           |
| <b>Wash times</b>                        | Three times                                                                        | Four times                                                      |
| <b>Model drug</b>                        | Arbutin                                                                            | Paeoniflorin                                                    |
| <b>Optimization method</b>               | Univariate analysis                                                                | Response surface method                                         |
| <b>Incubation time</b>                   | 15 min                                                                             | 30 min                                                          |
| <b>Incubation temperature</b>            | 37 °C                                                                              | 34.84 °C                                                        |
| <b>Incubation pH</b>                     | 6.8                                                                                | 6.98                                                            |
| <b>Reusability</b>                       | Yes                                                                                | Yes                                                             |
| <b>Application object</b>                | One herbal extract                                                                 | Herbal prescription                                             |
